# Supplementary material for: Anthropogenic secondary organic aerosol and ozone production from asphalt-related emissions
Source: Royal Society of Chemistry journal article supplement (doi:10.1039/d3ea00066d), 2023-01-01
Supplement: d3ea00066d1.pdf [file d3ea00066d1.pdf]

## SUPPORTING INFORMATION:

### **Anthropogenic Secondary Organic Aerosol and Ozone Production from Asphalt-Related Emissions**

Karl M. Seltzer,<sup>\*a</sup> Venkatesh Rao,<sup>a</sup> Havala O. T. Pye,<sup>b</sup> Benjamin N. Murphy,<sup>b</sup> Bryan K. Place,<sup>c</sup> Peeyush Khare,<sup>d, e</sup> Drew R. Gentner,<sup>d</sup> Christine Allen,<sup>f</sup> David Cooley,<sup>g</sup> Rich Mason,<sup>a</sup> Marc Houyoux<sup>a</sup>

<sup>a</sup>. Office of Air and Radiation, U.S. Environmental Protection Agency, 109 TW Alexander Dr, Research Triangle Park, NC 27711. E-mail: seltzer.karl@epa.gov

<sup>b</sup>. Office of Research and Development, U.S. Environmental Protection Agency, 109 TW Alexander Dr, Research Triangle Park, NC 27711.

<sup>c</sup>. Oak Ridge Institute for Science and Engineering (ORISE) Postdoctoral Program at the Office of Research and Development, US Environmental Protection Agency, Research Triangle Park, NC 27711.

<sup>d</sup>. Department of Chemical and Environmental Engineering, Yale University, New Haven, CT 06511.

<sup>e</sup>. Paul Scherrer Institute, 5232 Villigen, Aargau, Switzerland.

<sup>f</sup>. General Dynamics Information Technology, Research Triangle Park, NC, 27711.

<sup>g</sup>. Abt Associates, 5001 South Miami Boulevard, Suite 210, Durham, NC 27703.

Table S1: Nationwide usage and application, in-use, and total emission factors averages and 95% ranges for the Monte Carlo simulations.

| Statistic           | Usage [Gg]                                                                                                                                                       |                                                                                                                                                 |          |                                          |            |                                                                                                                                                  |
|---------------------|------------------------------------------------------------------------------------------------------------------------------------------------------------------|-------------------------------------------------------------------------------------------------------------------------------------------------|----------|------------------------------------------|------------|--------------------------------------------------------------------------------------------------------------------------------------------------|
|                     | Asphalt Cement                                                                                                                                                   | Hot-Mix                                                                                                                                         | Warm-Mix | Cutback                                  | Emulsified | Roofing                                                                                                                                          |
| Average             | 15416                                                                                                                                                            | 12235                                                                                                                                           | 3182     | 153                                      | 1960       | 2911                                                                                                                                             |
| 2.5%                | 14218                                                                                                                                                            | 11271                                                                                                                                           | 2855     | 137                                      | 1785       | 2602                                                                                                                                             |
| 97.5%               | 16619                                                                                                                                                            | 13211                                                                                                                                           | 3517     | 169                                      | 2136       | 3225                                                                                                                                             |
| Uncertainty Applied | ±25% uncertainty in usage at the state-level aggregations from the Asphalt Institute survey.<br>±25% uncertainty in hot- and warm-mix splits at the state-level. |                                                                                                                                                 |          |                                          |            |                                                                                                                                                  |
| Statistic           | Application Emission Factor [g kg <sup>-1</sup> ]                                                                                                                |                                                                                                                                                 |          |                                          |            |                                                                                                                                                  |
|                     | Asphalt Cement                                                                                                                                                   | Hot-Mix                                                                                                                                         | Warm-Mix | Cutback                                  | Emulsified | Roofing                                                                                                                                          |
| Average             | --                                                                                                                                                               | 3.92                                                                                                                                            | 2.11     | 406.68                                   | 97.58      | 0.20                                                                                                                                             |
| 2.5%                | --                                                                                                                                                               | 3.18                                                                                                                                            | 1.47     | 305.06                                   | 72.98      | 0.14                                                                                                                                             |
| 97.5%               | --                                                                                                                                                               | 4.38                                                                                                                                            | 2.41     | 509.20                                   | 121.98     | 0.22                                                                                                                                             |
| Uncertainty Applied | --                                                                                                                                                               | Skewed, non-negative with a threshold max value equivalent to a 6-hr timescale of emission and approximate mean of a 5-hr timescale of emission |          | ±25% uncertainty in NEI emission factors |            | Skewed, non-negative with a threshold max value equivalent to a 6-hr timescale of emission and approximate mean of a 5-hr timescale of emission. |
| Statistic           | In-Use Emission Factor [g kg <sup>-1</sup> ]                                                                                                                     |                                                                                                                                                 |          |                                          |            |                                                                                                                                                  |
|                     | Asphalt Cement                                                                                                                                                   | Hot-Mix                                                                                                                                         | Warm-Mix | Cutback                                  | Emulsified | Roofing                                                                                                                                          |
| Average             | --                                                                                                                                                               | 1.00                                                                                                                                            | 1.00     | 1.01                                     | 1.00       | 18.30                                                                                                                                            |
| 2.5%                | --                                                                                                                                                               | 0.13                                                                                                                                            | 0.14     | 0.15                                     | 0.15       | 9.61                                                                                                                                             |
| 97.5%               | --                                                                                                                                                               | 2.42                                                                                                                                            | 2.42     | 2.42                                     | 2.39       | 31.56                                                                                                                                            |
| Uncertainty Applied | --                                                                                                                                                               | Lognormally distributed with a mean value of ~1 g/kg                                                                                            |          |                                          |            | Lognormally distributed with a mean value of ~17.8 g/kg                                                                                          |
| Statistic           | Total Emission Factor [g kg <sup>-1</sup> ]                                                                                                                      |                                                                                                                                                 |          |                                          |            |                                                                                                                                                  |
|                     | Asphalt Cement                                                                                                                                                   | Hot-Mix                                                                                                                                         | Warm-Mix | Cutback                                  | Emulsified | Roofing                                                                                                                                          |
| Average             | --                                                                                                                                                               | 4.92                                                                                                                                            | 3.11     | 407.69                                   | 98.58      | 18.50                                                                                                                                            |
| 2.5%                | --                                                                                                                                                               | 3.32                                                                                                                                            | 1.61     | 305.20                                   | 73.12      | 9.75                                                                                                                                             |
| 97.5%               | --                                                                                                                                                               | 6.80                                                                                                                                            | 4.83     | 511.61                                   | 124.36     | 31.78                                                                                                                                            |

Note: All emission factor distributions are illustrated in Fig. S1.

Table S2: Statewide, population weighted, summertime-average SOA and MDA8 O<sub>3</sub> enhancements from asphalt-related emissions.

| State | SOA [ $\mu\text{g m}^{-3}$ ] |      |      |      |        | MDA8 O <sub>3</sub> [ppb] |      |      |      |        |
|-------|------------------------------|------|------|------|--------|---------------------------|------|------|------|--------|
|       | SON                          | DJF  | MAM  | JJA  | Annual | SON                       | DJF  | MAM  | JJA  | Annual |
| AL    | 0.02                         | 0.02 | 0.02 | 0.02 | 0.02   | 0.01                      | 0.01 | 0.00 | 0.00 | 0.01   |
| AZ    | 0.04                         | 0.03 | 0.03 | 0.03 | 0.03   | 0.04                      | 0.03 | 0.03 | 0.03 | 0.03   |
| AR    | 0.02                         | 0.02 | 0.02 | 0.02 | 0.02   | 0.01                      | 0.02 | 0.00 | 0.00 | 0.01   |
| CA    | 0.08                         | 0.05 | 0.05 | 0.07 | 0.06   | 0.10                      | 0.05 | 0.07 | 0.12 | 0.08   |
| CO    | 0.02                         | 0.02 | 0.02 | 0.02 | 0.02   | 0.02                      | 0.01 | 0.02 | 0.03 | 0.02   |
| CT    | 0.02                         | 0.02 | 0.02 | 0.05 | 0.03   | 0.02                      | 0.02 | 0.02 | 0.03 | 0.02   |
| DE    | 0.03                         | 0.02 | 0.03 | 0.04 | 0.03   | 0.02                      | 0.02 | 0.02 | 0.01 | 0.02   |
| DC    | 0.04                         | 0.03 | 0.04 | 0.06 | 0.04   | 0.03                      | 0.02 | 0.03 | 0.03 | 0.03   |
| FL    | 0.01                         | 0.01 | 0.02 | 0.01 | 0.01   | 0.01                      | 0.01 | 0.01 | 0.01 | 0.01   |
| GA    | 0.03                         | 0.02 | 0.02 | 0.03 | 0.02   | 0.01                      | 0.02 | 0.01 | 0.00 | 0.01   |
| ID    | 0.01                         | 0.01 | 0.01 | 0.01 | 0.01   | 0.01                      | 0.01 | 0.00 | 0.00 | 0.01   |
| IL    | 0.04                         | 0.03 | 0.04 | 0.06 | 0.04   | 0.03                      | 0.02 | 0.04 | 0.04 | 0.03   |
| IN    | 0.03                         | 0.03 | 0.03 | 0.05 | 0.04   | 0.02                      | 0.03 | 0.02 | 0.01 | 0.02   |
| IA    | 0.02                         | 0.03 | 0.03 | 0.03 | 0.03   | 0.01                      | 0.02 | 0.02 | 0.00 | 0.01   |
| KS    | 0.02                         | 0.02 | 0.03 | 0.03 | 0.02   | 0.01                      | 0.01 | 0.01 | 0.00 | 0.01   |
| KY    | 0.03                         | 0.03 | 0.03 | 0.04 | 0.03   | 0.01                      | 0.02 | 0.01 | 0.00 | 0.01   |
| LA    | 0.02                         | 0.02 | 0.02 | 0.02 | 0.02   | 0.01                      | 0.01 | 0.01 | 0.01 | 0.01   |
| ME    | 0.01                         | 0.01 | 0.01 | 0.01 | 0.01   | 0.01                      | 0.01 | 0.00 | 0.00 | 0.01   |
| MD    | 0.03                         | 0.03 | 0.03 | 0.05 | 0.03   | 0.02                      | 0.02 | 0.02 | 0.01 | 0.02   |
| MA    | 0.02                         | 0.02 | 0.02 | 0.03 | 0.02   | 0.01                      | 0.01 | 0.01 | 0.01 | 0.01   |
| MI    | 0.03                         | 0.03 | 0.03 | 0.05 | 0.04   | 0.02                      | 0.02 | 0.02 | 0.02 | 0.02   |
| MN    | 0.02                         | 0.03 | 0.04 | 0.03 | 0.03   | 0.01                      | 0.02 | 0.03 | 0.02 | 0.02   |
| MS    | 0.02                         | 0.02 | 0.02 | 0.02 | 0.02   | 0.01                      | 0.01 | 0.00 | 0.00 | 0.00   |
| MO    | 0.03                         | 0.02 | 0.03 | 0.03 | 0.03   | 0.01                      | 0.02 | 0.01 | 0.00 | 0.01   |
| MT    | 0.01                         | 0.00 | 0.01 | 0.01 | 0.01   | 0.00                      | 0.00 | 0.00 | 0.00 | 0.00   |
| NE    | 0.02                         | 0.02 | 0.03 | 0.03 | 0.02   | 0.01                      | 0.01 | 0.01 | 0.01 | 0.01   |
| NV    | 0.03                         | 0.01 | 0.02 | 0.04 | 0.02   | 0.02                      | 0.01 | 0.02 | 0.03 | 0.02   |
| NH    | 0.01                         | 0.02 | 0.01 | 0.02 | 0.02   | 0.01                      | 0.01 | 0.01 | 0.00 | 0.01   |
| NJ    | 0.03                         | 0.03 | 0.03 | 0.06 | 0.04   | 0.03                      | 0.02 | 0.03 | 0.04 | 0.03   |
| NM    | 0.02                         | 0.02 | 0.01 | 0.02 | 0.02   | 0.02                      | 0.01 | 0.01 | 0.01 | 0.01   |
| NY    | 0.03                         | 0.03 | 0.03 | 0.06 | 0.04   | 0.03                      | 0.02 | 0.03 | 0.07 | 0.04   |
| NC    | 0.03                         | 0.02 | 0.02 | 0.03 | 0.02   | 0.01                      | 0.02 | 0.01 | 0.00 | 0.01   |
| ND    | 0.01                         | 0.01 | 0.01 | 0.01 | 0.01   | 0.00                      | 0.01 | 0.01 | 0.00 | 0.00   |
| OH    | 0.03                         | 0.03 | 0.04 | 0.05 | 0.04   | 0.02                      | 0.03 | 0.02 | 0.01 | 0.02   |
| OK    | 0.02                         | 0.02 | 0.03 | 0.03 | 0.03   | 0.01                      | 0.02 | 0.01 | 0.01 | 0.01   |
| OR    | 0.02                         | 0.00 | 0.01 | 0.02 | 0.01   | 0.02                      | 0.00 | 0.01 | 0.02 | 0.01   |
| PA    | 0.03                         | 0.03 | 0.03 | 0.04 | 0.03   | 0.02                      | 0.02 | 0.02 | 0.01 | 0.02   |
| RI    | 0.02                         | 0.02 | 0.02 | 0.04 | 0.02   | 0.01                      | 0.01 | 0.02 | 0.01 | 0.01   |
| SC    | 0.02                         | 0.02 | 0.02 | 0.02 | 0.02   | 0.01                      | 0.02 | 0.00 | 0.00 | 0.01   |
| SD    | 0.01                         | 0.01 | 0.02 | 0.02 | 0.01   | 0.00                      | 0.01 | 0.01 | 0.00 | 0.00   |
| TN    | 0.03                         | 0.02 | 0.03 | 0.03 | 0.03   | 0.01                      | 0.02 | 0.01 | 0.00 | 0.01   |
| TX    | 0.02                         | 0.02 | 0.03 | 0.02 | 0.02   | 0.02                      | 0.02 | 0.01 | 0.01 | 0.02   |
| UT    | 0.02                         | 0.01 | 0.01 | 0.02 | 0.01   | 0.01                      | 0.01 | 0.01 | 0.01 | 0.01   |
| VT    | 0.01                         | 0.02 | 0.01 | 0.02 | 0.01   | 0.01                      | 0.02 | 0.00 | 0.00 | 0.01   |
| VA    | 0.02                         | 0.02 | 0.02 | 0.03 | 0.03   | 0.01                      | 0.02 | 0.01 | 0.00 | 0.01   |
| WA    | 0.01                         | 0.00 | 0.01 | 0.02 | 0.01   | 0.01                      | 0.00 | 0.02 | 0.03 | 0.02   |
| WV    | 0.02                         | 0.02 | 0.02 | 0.03 | 0.02   | 0.01                      | 0.02 | 0.01 | 0.00 | 0.01   |
| WI    | 0.03                         | 0.03 | 0.03 | 0.05 | 0.04   | 0.02                      | 0.02 | 0.02 | 0.02 | 0.02   |
| WY    | 0.01                         | 0.01 | 0.01 | 0.01 | 0.01   | 0.00                      | 0.00 | 0.00 | 0.00 | 0.00   |

Table S3: Summary of data in Fig. S3.

| Region | OC NMB % |      |      |       | PM <sub>2.5</sub> NMB % |       |       |       | MDA8 O <sub>3</sub> NMB % |       |       |       |
|--------|----------|------|------|-------|-------------------------|-------|-------|-------|---------------------------|-------|-------|-------|
| NE     | 0.48     | 0.97 | 0.42 | -0.19 | 0.11                    | 0.21  | 0.07  | -0.26 | 0.16                      | 0.02  | -0.14 | 0.04  |
| SE     | 0.33     | 0.36 | 0.15 | -0.16 | 0.03                    | 0.11  | -0.06 | -0.28 | 0.11                      | -0.05 | -0.12 | 0.11  |
| MW     | 0.40     | 1.29 | 0.53 | -0.32 | 0.16                    | 0.24  | 0.21  | -0.23 | 0.17                      | 0.10  | -0.13 | 0.09  |
| PL     | 0.22     | 0.79 | 0.26 | -0.46 | 0.14                    | 0.17  | 0.08  | -0.41 | 0.05                      | -0.03 | -0.15 | -0.02 |
| SW     | -0.09    | 0.04 | 0.20 | -0.32 | -0.23                   | -0.21 | 0.03  | -0.32 | -0.11                     | -0.11 | -0.23 | -0.13 |
| NW     | -0.11    | 0.85 | 0.41 | -0.46 | 0.03                    | -0.08 | 0.27  | -0.45 | -0.03                     | -0.06 | -0.18 | -0.08 |
| Season | SON      | DJF  | MAM  | JJA   | SON                     | DJF   | MAM   | JJA   | SON                       | DJF   | MAM   | JJA   |

| Region | OC n Observations |      |      |      | PM <sub>2.5</sub> n Observations |       |       |       | MDA8 O <sub>3</sub> n Observations |       |       |       |
|--------|-------------------|------|------|------|----------------------------------|-------|-------|-------|------------------------------------|-------|-------|-------|
| NE     | 1314              | 1317 | 1324 | 1359 | 17592                            | 18354 | 18395 | 18375 | 14632                              | 11251 | 18082 | 18615 |
| SE     | 844               | 818  | 853  | 912  | 15941                            | 15927 | 16635 | 16718 | 13701                              | 7810  | 18891 | 18477 |
| MW     | 887               | 905  | 904  | 932  | 14614                            | 15194 | 15265 | 15183 | 14059                              | 7691  | 18189 | 18361 |
| PL     | 2050              | 1964 | 2014 | 2030 | 23288                            | 21974 | 22894 | 23591 | 25904                              | 20983 | 28423 | 28668 |
| SW     | 1344              | 1320 | 1347 | 1368 | 16397                            | 16422 | 16786 | 17052 | 19788                              | 17597 | 20660 | 21512 |
| NW     | 641               | 596  | 620  | 644  | 11735                            | 11390 | 11687 | 12099 | 1114                               | 664   | 1397  | 2400  |
| Season | SON               | DJF  | MAM  | JJA  | SON                              | DJF   | MAM   | JJA   | SON                                | DJF   | MAM   | JJA   |

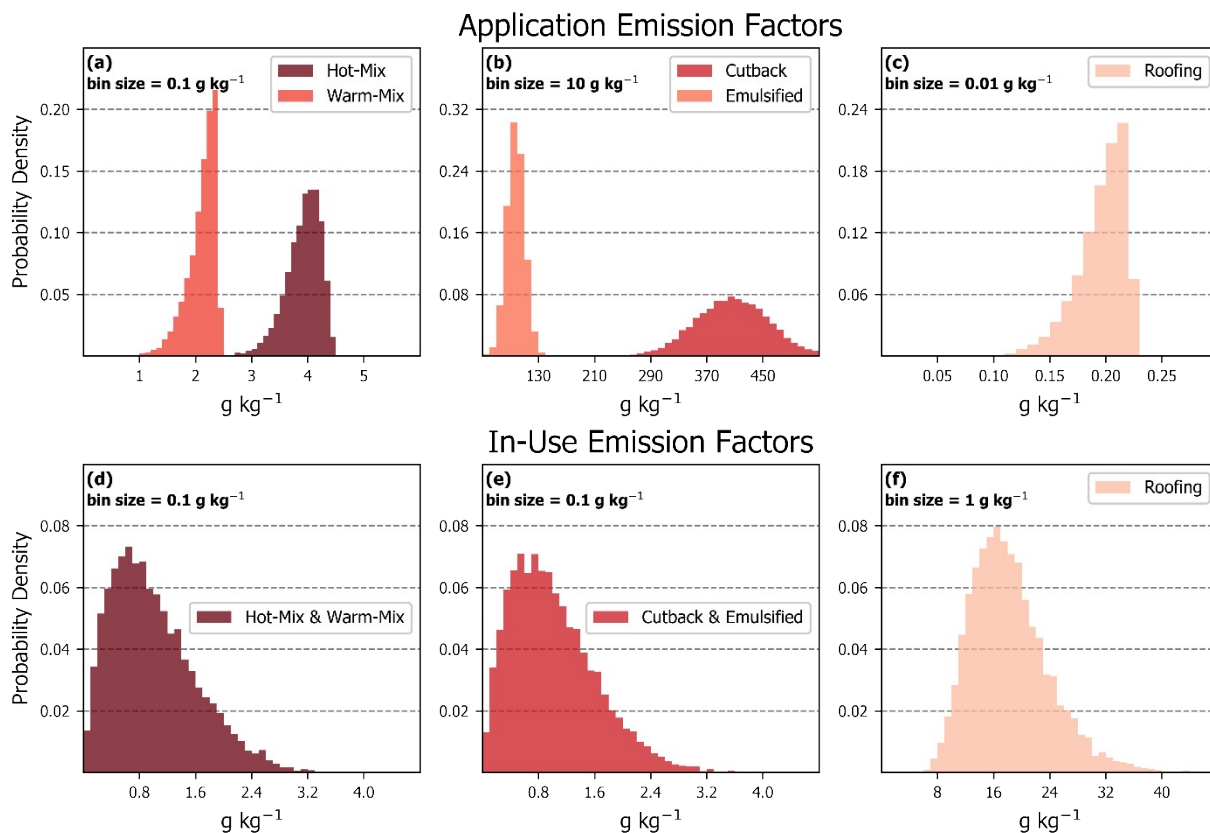

Figure S1. Application emission factors, in  $\text{g kg}^{-1}$  of liquid asphalt, for (a) hot- and warm-mix paving asphalt, (b) cutback and emulsified paving asphalt, and (c) roofing asphalt from the Monte Carlo analysis. In-use emission factors, in  $\text{g kg}^{-1}$  of liquid asphalt, for (d) hot- and warm-mix paving asphalt, (e) cutback and emulsified paving asphalt, and (f) roofing asphalt from the Monte Carlo analysis.

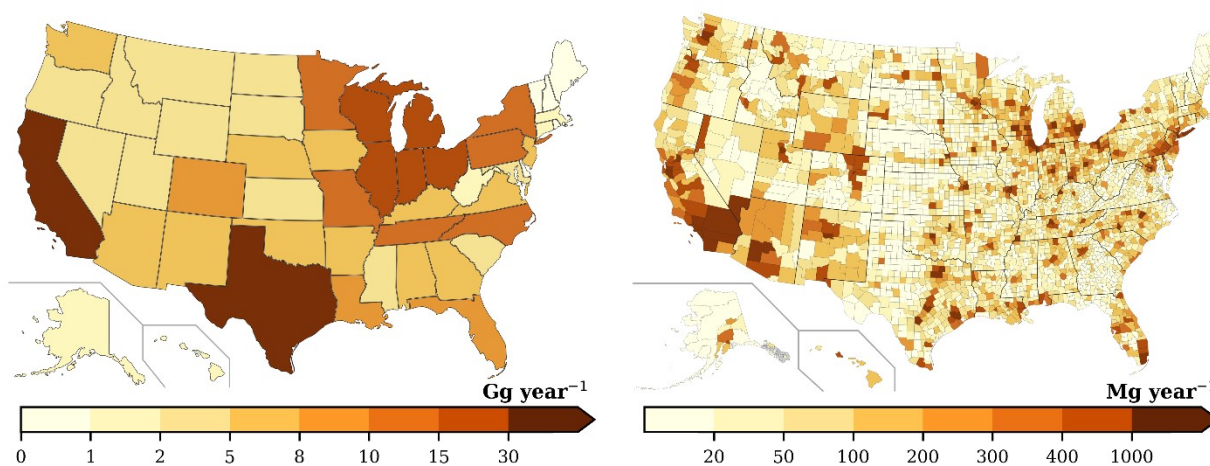

Figure S2. (Left) State-level and (Right) county-level of asphalt-related emissions.

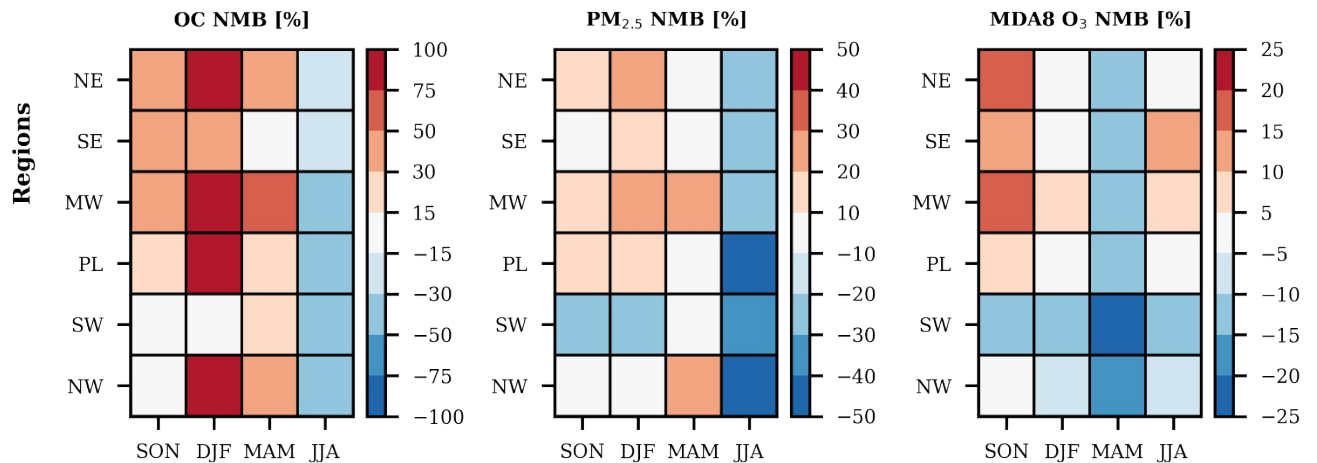

Figure S3. Modeling performance metrics for OC,  $PM_{2.5}$ , and maximum daily 8-hour  $O_3$ , disaggregated by season and region. Note: NE – U.S. EPA Regions 1, 2, 3; SE – U.S. EPA Region 4; MW – U.S. EPA Region 5; PL – U.S. EPA Regions 6, 7, 8; SW – U.S. EPA Region 9; NW – U.S. EPA Region 10; SON – fall months; DJF – winter months; MAM – spring months; JJA – summer months; NMB – normalized mean bias. A numerical summary of this data can be found in Table S3.

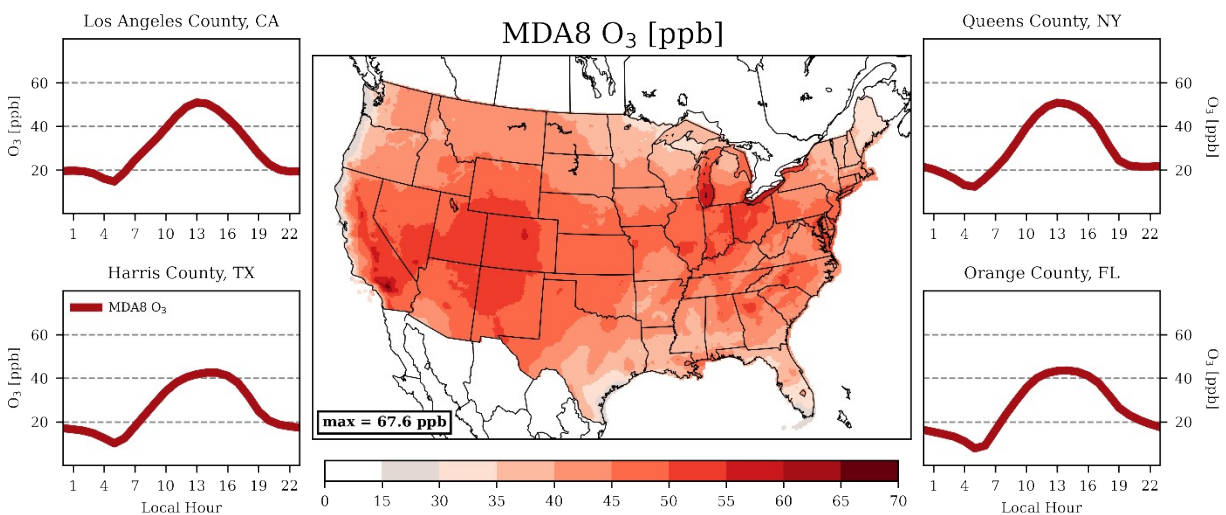

Figure S4. Summertime-average MDA8  $O_3$  from the simulation that includes the new asphalt-related emissions (center). Diurnal, population-weighted  $O_3$  (side panels). Note that Houston and Orlando are located in Harris County, TX and Orange County, Florida, respectively.

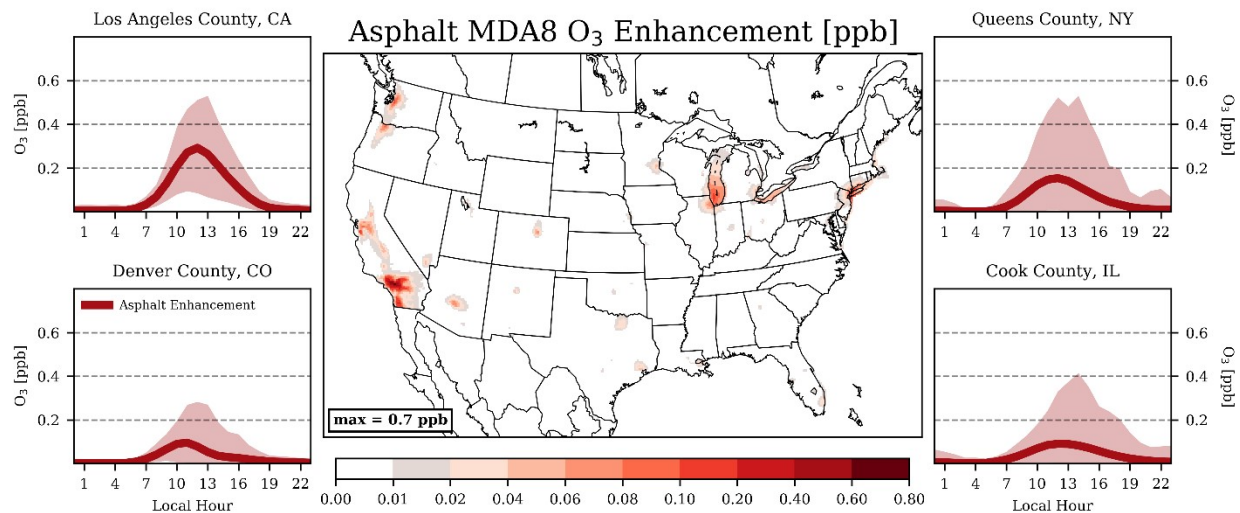

Figure S5. Summertime-average MDA8 O<sub>3</sub> enhancements from asphalt-related emissions (center). Diurnal, population weighted O<sub>3</sub> enhancements from asphalt-related emissions for select counties (side panels) where the lines indicate the average asphalt-related enhancements for each hour of the day and shading represents the asphalt-related enhancements for 95% of all days.
